# Supplementary material for: Outcome at age 7 of epilepsy presenting in the first 2 years of life. A population‐based study
Source: PubMed Central journal article supplement — Epilepsia. 2022 Jun 25;63(8):2096–107. doi: 10.1111/epi.17314 (PMC9544859; doi:10.1111/epi.17314), 2022-06-25
Supplement: EPI-63-2096-s001.pdf [file EPI-63-2096-s001.pdf]

**Supplementary material Stödberg et al: Outcome at age 7 of epilepsy presenting in the first two years of life. A population-based study.**

**Table S1.** Data abstracted from medical records (n=116) and telephone interviews (n=6)

|                                           |                                                                                            |
|-------------------------------------------|--------------------------------------------------------------------------------------------|
| Demographic                               | Sex                                                                                        |
| Heredity                                  | Epilepsy in father, mother, sibling                                                        |
|                                           | Febrile seizures in father, mother, sibling                                                |
| Past history (before epilepsy)            | Febrile seizure                                                                            |
|                                           | Acute symptomatic seizure                                                                  |
|                                           | Encephalitis/meningitis                                                                    |
|                                           | Stroke                                                                                     |
|                                           | Head trauma                                                                                |
|                                           | Neonatal disease potentially affecting the CNS                                             |
|                                           | Other risk factors for epilepsy                                                            |
|                                           | Developmental delay at epilepsy onset                                                      |
| Epilepsy                                  | Age at first unprovoked seizure                                                            |
|                                           | Seizure type, first unprovoked                                                             |
|                                           | Age at second unprovoked seizure                                                           |
|                                           | Seizure type, second unprovoked                                                            |
|                                           | Age at epilepsy diagnosis                                                                  |
|                                           | Seizure types occurring up to age 7 years                                                  |
|                                           | Status epilepticus                                                                         |
|                                           | Maximum seizure frequency: daily for 4 weeks at any time?                                  |
| Work-up (normal, abnormal, not performed) | EEG, video-EEG, MR, DT, Genetics(which type), PET, SPECT, MEG, fMRI, nTMS, other (specify) |
| Etiology                                  | Type (genetic, structural, metabolic, infectious, immune, unknown)                         |
|                                           | Specific etiology                                                                          |
| Epilepsy syndrome                         | According o the ILAE                                                                       |

|                                |                                                                                      |
|--------------------------------|--------------------------------------------------------------------------------------|
| Death before age 7 years       | Yes, No                                                                              |
|                                | Cause of death                                                                       |
| Seizure outcome at age 7 years | Number of ASMs                                                                       |
|                                | Seizure free for: < 1month, 1-6 months, 6-12 months, 1-2 years, 2-5 years, > 5 years |
| Comorbidities at age 7 years   | Intellectual disability                                                              |
|                                | Autism spectrum disorder                                                             |
|                                | Cerebral palsy                                                                       |
|                                | ADHD/ADD                                                                             |
|                                | Other learning impairments (verbal, non-verbal)                                      |
|                                | Other motor impairments (ataxia, dyskinesia, hypotonia...)                           |
| School form at age 7 years     | Mainstream school with extra individual support                                      |
|                                | Mainstream school without extra individual support                                   |
|                                | Special education school                                                             |
