# Supplementary material for: Outcome at age 7 of epilepsy presenting in the first 2 years of life. A population‐based study
Source: PubMed Central journal article supplement — Epilepsia. 2022 Jun 25;63(8):2096–107. doi: 10.1111/epi.17314 (PMC9544859; doi:10.1111/epi.17314), 2022-06-25
Supplement: EPI-63-2096-s002.pdf [file EPI-63-2096-s002.pdf]

|                                                                         |     |    |    |    |    |    |    |    |    |    |    |    |    |    |    |    |    |
|-------------------------------------------------------------------------|-----|----|----|----|----|----|----|----|----|----|----|----|----|----|----|----|----|
| Max sz frequency daily for 4 weeks at any time vs not daily for 4 weeks | Yes | 11 | 52 | 48 | 15 | 8  | 55 | 33 | 30 | 21 | 31 | 16 | 36 | 7  | 56 | 18 | 34 |
|                                                                         | No  | 0  | 52 | 9  | 43 | 5  | 47 | 5  | 47 | 39 | 13 | 37 | 15 | 32 | 20 | 43 | 9  |
| Status epilepticus                                                      | Yes | 1  | 15 | 14 | 2  | 3  | 13 | 9  | 7  | 0  | 15 | 0  | 15 | 0  | 16 | 4  | 11 |
|                                                                         | No  | 10 | 90 | 43 | 57 | 10 | 90 | 29 | 71 | 61 | 29 | 54 | 36 | 40 | 60 | 58 | 32 |
| Syndrome, West                                                          | Yes | 2  | 31 | 23 | 10 | 6  | 27 | 13 | 20 | 19 | 12 | 15 | 16 | 5  | 28 | 12 | 19 |
|                                                                         | No  | 9  | 74 | 34 | 49 | 7  | 76 | 25 | 58 | 42 | 32 | 39 | 35 | 35 | 48 | 50 | 24 |
| Etiology known                                                          | Yes | 11 | 64 | 52 | 23 | 7  | 68 | 38 | 37 | 29 | 35 | 24 | 40 | 14 | 61 | 26 | 38 |
|                                                                         | No  | 0  | 41 | 5  | 36 | 6  | 35 | 0  | 41 | 32 | 9  | 30 | 11 | 26 | 15 | 36 | 5  |
| Etiology struct/metabol                                                 | Yes | 11 | 41 | 40 | 12 | 5  | 47 | 36 | 16 | 13 | 28 | 9  | 32 | 6  | 46 | 14 | 27 |
|                                                                         | No  | 0  | 64 | 17 | 47 | 8  | 56 | 2  | 62 | 48 | 16 | 45 | 19 | 34 | 30 | 48 | 16 |
| Etiology conf genetic                                                   | Yes | 8  | 26 | 27 | 7  | 3  | 31 | 17 | 17 | 14 | 12 | 12 | 14 | 4  | 30 | 8  | 18 |
|                                                                         | No  | 3  | 79 | 30 | 52 | 10 | 72 | 21 | 61 | 47 | 32 | 42 | 37 | 36 | 46 | 54 | 25 |
| EEG, worst, first 6 months. Any abn vs normal                           | Yes | 9  | 74 | 50 | 33 | 11 | 72 | 34 | 49 | 34 | 40 | 28 | 46 | 16 | 67 | 36 | 38 |
|                                                                         | No  | 2  | 31 | 7  | 26 | 2  | 31 | 4  | 29 | 27 | 4  | 26 | 5  | 24 | 9  | 26 | 5  |
| MRI abnormality .                                                       | Yes | 4  | 33 | 29 | 8  | 6  | 31 | 23 | 14 | 11 | 22 | 7  | 26 | 1  | 36 | 10 | 23 |
|                                                                         | No  | 0  | 20 | 9  | 11 | 4  | 16 | 2  | 18 | 9  | 11 | 9  | 11 | 6  | 14 | 11 | 9  |
| First sz type spasm vs focal                                            | Yes | 0  | 24 | 15 | 9  | 6  | 18 | 7  | 17 | 16 | 8  | 12 | 12 | 5  | 19 | 11 | 13 |
|                                                                         | No  | 2  | 51 | 22 | 51 | 4  | 49 | 15 | 38 | 24 | 27 | 24 | 27 | 20 | 33 | 32 | 19 |
